# Supplementary material
Source: Springer Nature journal article supplement (https://www.springermedizin.de/resource/supplementary/12891_2012_1557_MOESM6_ESM.pdf/9508368)
Supplement: MOESM6 [file 9508368]

SUPERIOR

0 / 0

3 / 22  
13.6%

1 / 108  
0.9%

3 / 14  
21.4%

6 / 158  
3.8%

5 / 792  
0.6%

9 / 175  
5.1%  
%

11 / 195  
5.6%

5 / 910  
0.5%

9 / 167  
5.4%

3 / 67  
4.5%

INFERIOR

ANTERIOR

POSTERIOR
